# Supplementary material
Source: Springer Nature journal article supplement (https://www.springermedizin.de/resource/supplementary/12943_2009_580_MOESM8_ESM.pdf/9555018)
Supplement: MOESM8 [file 9555018]

# A

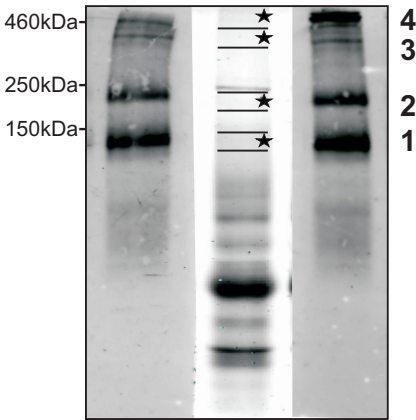

# B

1 11 21 31 41 51  
MPALWLGCCLCFSLLLPAARATSRREVCDNCGKSRQCFDRELHRQTGNNGFRCLNCNDNT  
61 71 81 91 101 111  
DGIHCECKNGFYRHRERDRCLPCNCSKGSLSARCDNSGRCSCKPGVTGARCDRCLPGF  
121 131 141 151 161 171  
HMLTDAGCTQDQRLDLSKCDPAGIAGPCDAGRCVCKPAVTGERCDRCRSGYYNLDGGN  
181 191 201 211 221 231  
PEGCTQCFYGHSSASCRSSAEYSVHKITSTFHQDVDGWKAVQRNGSPAKLQWSQRHQDVF  
241 251 261 271 281 291  
SSAQRLDPVYFVAPAKFLGNQQVSYGQSLSFYRVDVDRGGRHPSAHDVILEGAGLRITAPL  
301 311 321 331 341 351  
MPLGKTLPCGLTKTYTFRNLNEHPSNNWSPQLSYFEYRLLRNLTALRIRATYGEYSTGYI  
361 371 381 391 401 411  
DNVTLISARPVSGAPAPWVEQCICPVGYKGQFCQDCASGYKRDSARLGPFGTICIPNCQG  
421 431 441 451 461 471  
GGACDPDTGDCYSGDENPDIECADCPIGFYNDPHDPRCKPCPCHNGFSCSVMPEEEVV  
481 491 501 511 521 531  
CNNCPPGVTGARCELCADGYFGDPFGEHGVPVRPCQPCQCNNDVPSASGNCDRLTGRCLK  
541 551 561 571 581 591  
CIHNTAGIYCDQCKAGYFGDPLAPNPADKCRACNCNPMGSEFPVGRSDGTCVCKPGFGGP  
601 611 621 631 641 651  
NCEHGAFSPACYNQVKIQMDQFMQQLQRMELISKAQGGDGVVDPDTELEGRMQAEQAL  
661 671 681 691 701 711  
QDILRDAQISEGASRSLGLQAKVRSQENSYSQSRLLDDLKMTVERVRLGSAQYQNRVRDTH  
721 731 741 751 761 771  
RLITQMQLSLAEEASLGNTNIPASDHYVGPNGFKSLAQEATRLAESHVESANMEQLTR  
781 791 801 811 821 831  
ETEDYSKQALSLVRKALHEGVGSGSGSPDGAVVQGLVEKLEKTKSLAQQLTREATQAEIE  
841 851 861 871 881 891  
ADRSYQHSRLRLDSVSRLOQVSDQSFQVEEAKRIKQKADSLSSLVTRHMEFKRTQKNLG  
901 911 921 931 941 951  
NWKEEAQQLLQNGKSGREKSDQLLSRANLAKSRAQEALSMGNATFYEVESILKNLREFDL  
961 971 981 991 1001 1011  
QVDNRKAEAEAMKRLSYISQKVSASDKTQQAERALGSAADAQRAKNGAGEALEISSE  
1021 1031 1041 1051 1061 1071  
IEQEIGSLNLEANVTADGALAMEKGLASLKSEMREVEGELERKELEFDTNMDAVQMVITE  
1081 1091 1101 1111  
AQKVDTRAKNAGVTIQDTLNTLDGLLHLMGM
